# Supplementary material for: Spontaneous Primary Succession and Vascular Plant Recovery in the Iberian Gypsum Quarries: Insights for Ecological Restoration in an EU Priority Habitat
Source: MDPI journal article supplement (doi:10.3390/plants12051162), 2023-03-03
Supplement: s1 [file s1]

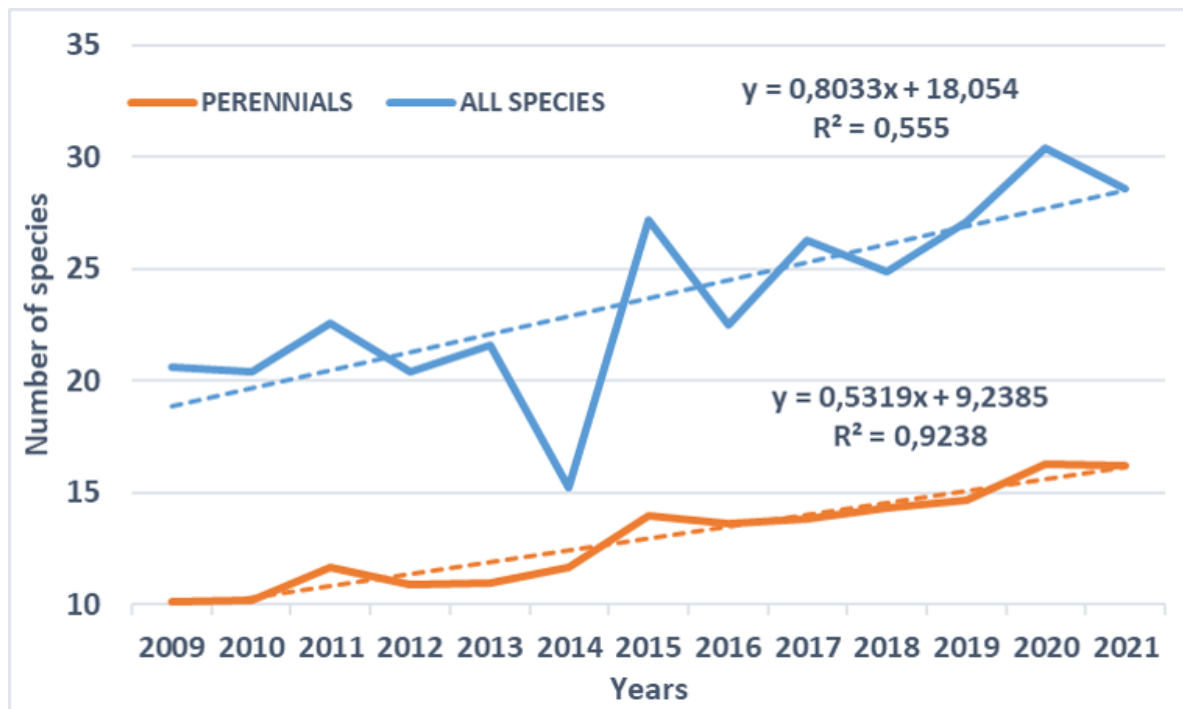

Figure S1: Variation in species richness throughout the chronosequence.

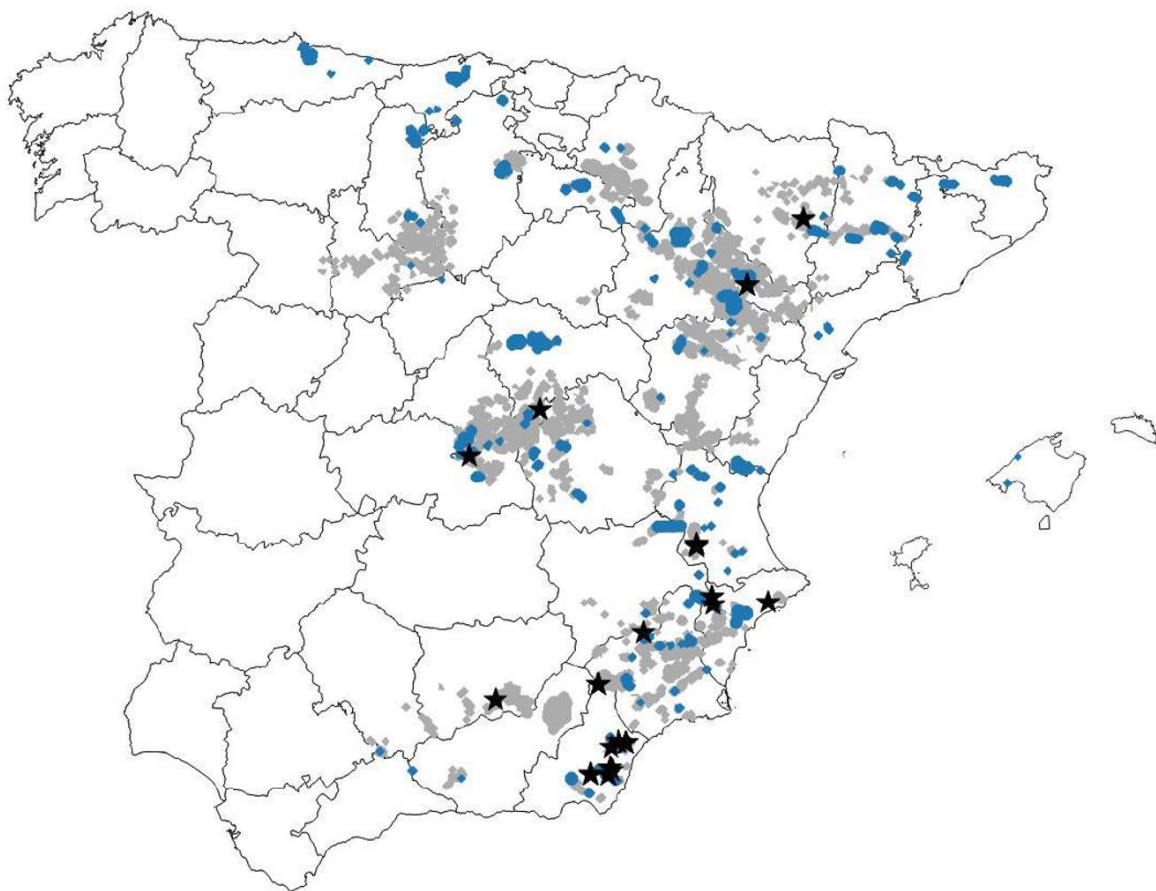

Figure S2: Location of the sampled gypsum quarries in which spontaneous succession processes were recognized (black stars). Grey, Iberian gypsum outcrops with gypsicolous vegetation [48], and blue Spanish gypsum mining concessions (<https://www.igme.es/>).
