# Supplementary material for: Spontaneous Primary Succession and Vascular Plant Recovery in the Iberian Gypsum Quarries: Insights for Ecological Restoration in an EU Priority Habitat
Source: Plants (Basel). 2023 Mar 3;12(5):1162. doi: 10.3390/plants12051162 (PMC10006988; doi:10.3390/plants12051162)
Supplement: Supplementary file 1 [file plants-12-01162-s001.zip › TableS1.xlsx]

## Sheet: Hoja1
APPENDIX_A		Acronyms, scientific names, degree of gypsophily (according to Mota et al., 2011) of the 183 species recorded in the plots (MAJ = plots of the chronosequences according to the year; R = plots of the restoration; S = scrubland). 1 = presence; 0 = absence
N_ORD	ACRONYM	SCIENTIFIC_NAME	Life cycle	Gypsophily	MAJ_09	MAJ_10	MAJ_11	MAJ_12	MAJ_13	MAJ_14	MAJ_15	MAJ_16	MAJ_17	MAJ_18	MAJ_19	MAJ_20	MAJ_21	MAJ_R	S
1	Aeg_gen	Aegilops geniculata Roth	ANNUAL	1	0	1	1	0	0	0	0	0	0	0	0	0	0	1	1
2	Aeg_neg	Aegilops neglecta Req. ex Bertol.	ANNUAL	1	0	0	0	0	0	0	0	0	0	0	0	0	0	0	0
3	Ana_cla	Anacyclus clavatus (Desf.) Pers.	ANNUAL	1	0	0	1	0	0	0	0	0	0	0	1	0	0	0	1
4	And_rag	Andryala ragusina L.	PERENNIAL	1	1	1	1	1	1	1	1	1	1	1	1	1	1	0	0
5	Ant_cyt	Anthyllis cytisoides L.	PERENNIAL	2	1	1	1	1	1	1	1	1	1	1	0	0	1	0	1
6	Ant_ter	Anthyllis terniflora (Lag.) Pau	PERENNIAL	1	1	1	1	1	1	1	1	1	1	1	1	1	1	1	1
7	Art_bar	Artemisia barrelieri Besser	PERENNIAL	2	0	0	1	0	1	0	1	1	1	0	1	1	1	1	1
8	Art_glu	Artemisia campestris subsp. glutinosa (Besser) Batt.	PERENNIAL	1	0	0	0	0	0	0	0	0	0	0	0	0	0	1	1
9	Asp_acu	Asparagus acutifolius L.	PERENNIAL	1	0	0	1	0	0	0	0	0	0	0	0	0	0	1	0
10	Asp_cer	Asphodelus cerasiferus J. Gay	PERENNIAL	1.75	0	0	0	0	0	0	0	0	0	0	0	0	0	1	0
11	Asp_hor	Asparagus horridus L.	PERENNIAL	1	0	0	0	0	0	0	0	0	0	0	0	0	1	0	1
12	Ast_gro	Astragalus alopecuroides subsp. grosii (Pau) Rivas Goday & Rivas Mart.	PERENNIAL	3	0	0	0	0	0	0	0	0	0	0	0	0	0	0	1
13	Ast_lin	Asterolinon linum-stellatum (L.) Duby	ANNUAL	1	0	0	0	0	0	0	0	0	0	0	0	0	0	1	0
14	Ast_ste	Astragalus stella L.	ANNUAL	1	0	0	0	0	0	0	1	0	0	0	0	0	0	0	1
15	Atr_can	Atractylis cancellata L.	ANNUAL	1	0	0	0	0	0	0	1	1	0	1	1	1	1	1	1
16	Atr_hal	Atriplex halimus L.	PERENNIAL	2	0	0	0	0	0	0	0	0	0	0	0	0	0	1	1
17	Ave_bar	Avena barbata subsp. barbata Pott ex Link	ANNUAL	1	0	1	1	0	0	0	1	0	1	0	0	0	1	1	0
18	Ave_fes	Avellinia festucoides (Link) Valdés & H. Scholz.	ANNUAL	1	0	1	0	0	0	0	0	0	0	0	0	0	0	0	1
19	Ave_ste	Avena sterilis L.	ANNUAL	1	1	1	1	1	1	0	1	1	1	1	1	1	0	0	0
20	Bar_tri	Bartsia trixago L.	ANNUAL	1	0	0	0	0	0	0	0	0	0	0	0	0	0	1	0
21	Bom_ere	Bombycilaena erecta (L.) Smoljan	ANNUAL	1	0	0	0	0	0	0	0	0	0	0	0	0	0	0	1
22	Bra_dis	Brachypodium distachyon (L.) P. Beauv.	ANNUAL	1	1	1	1	1	1	1	1	1	1	1	1	1	1	0	1
23	Bro_dia	Bromus diandrus Roth	ANNUAL	1	0	1	0	0	0	0	0	0	0	0	0	0	0	1	1
24	Bro_hor	Bromus hordeaceus L.	ANNUAL	1	0	0	0	1	0	0	0	0	0	0	0	0	0	0	0
25	Bro_rub	Bromus rubens L.	ANNUAL	1	1	1	1	1	1	1	1	1	1	1	1	1	1	0	0
26	Buf_ten	Bufonia tenuifolia L.	ANNUAL	1	1	0	0	0	0	0	1	1	0	0	1	1	1	1	1
27	Bup_sem	Bupleurum semicompositum L.	ANNUAL	1	0	0	0	0	0	0	0	0	0	0	0	0	0	1	0
28	Cal_arv	Calendula arvensis (Vaill.) L.	ANNUAL	1	1	0	0	0	0	0	0	0	0	0	0	0	0	0	1
29	Cam_eri	Campanula erinus L.	ANNUAL	1	1	0	0	0	0	0	0	0	0	0	0	0	0	1	1
30	Cam_fas	Campanula fastigiata Dufour ex A. DC.	ANNUAL	5	0	0	0	0	0	0	0	0	0	0	0	0	0	0	1
31	Car_ann	Carrichtera annua (L.) DC.	ANNUAL	1	0	0	0	0	0	0	1	0	0	0	0	0	0	0	1
32	Car_cor	Carlina corymbosa L.	PERENNIAL	1	0	0	0	0	0	0	0	0	0	0	0	0	0	0	1
33	Cen_ ser	Centaurea seridis L.	ANNUAL	1	0	0	0	0	0	0	0	0	0	0	0	0	0	0	1
34	Cen_ben	Centaurea benedicta (L.) L.	ANNUAL	1	0	0	0	0	0	0	0	0	0	0	0	0	0	1	0
35	Cen_mel	Centaurea melitensis L.	ANNUAL	1	0	0	0	0	1	0	1	1	1	1	1	1	1	0	1
36	Cen_qua	Centaurium quadrifolium (L.) G. López & C. E. Jarvis	ANNUAL	1	0	0	0	0	0	0	0	0	0	0	0	0	0	0	1
37	Cha_gra	Chaenorhinum grandiflorum subsp. grandiflorum (Coss.) Willk.	ANNUAL	4.5	1	1	1	1	1	1	1	1	1	1	1	1	1	1	1
38	Cho_jun	Chondrilla juncea L.	PERENNIAL	1	0	0	0	0	0	0	0	0	0	0	0	0	0	0	1
39	Con_alt	Convolvulus althaeoides L.	PERENNIAL	1	0	0	0	0	0	0	0	1	1	0	0	0	0	1	0
40	Cor_can	Corynephorus canescens (L.) P. Beauv.	PERENNIAL	1	0	0	0	0	0	0	0	0	0	0	0	0	0	0	1
41	Cor_his	Coris hispanica Lange	PERENNIAL	4	1	1	0	0	0	0	1	1	1	1	1	1	1	0	1
42	Cor_jun	Coronilla juncea L.	PERENNIAL	1	0	0	0	0	0	0	0	0	0	0	0	0	0	1	1
43	Cor_sco	Coronilla scorpioides (L.) W.D.J. Koch	ANNUAL	1	0	0	0	0	0	0	0	0	0	0	0	0	0	1	0
44	Cre_ves	Crepis vesicaria L.	ANNUAL	1	0	0	1	1	1	0	1	0	0	1	0	1	1	0	1
45	Cru_vul	Crupina vulgaris Pers. ex Cass.	ANNUAL	1	0	0	0	0	0	0	1	0	0	0	0	0	0	1	0
46	Cus_kot	Cuscuta epithymum (L.) L.	PERENNIAL	1	0	0	0	0	0	0	0	0	0	0	0	0	0	0	1
47	Dac_glo	Dactylis glomerata L.	PERENNIAL	1	1	1	1	1	1	1	1	1	1	1	1	1	1	0	1
48	Des_rig	Desmazeria rigida subsp. rigida (L.) Tutin	ANNUAL	1	1	1	1	1	1	0	1	1	1	1	1	1	1	1	1
49	Dip_ilo	Diplotaxis ilorcitana (Sennen) Aedo, Mart.-Laborde & Muñoz Garm.	ANNUAL	2	0	0	0	0	0	0	0	0	0	0	0	0	0	1	1
50	Dip_lag	Diplotaxis harra subsp. lagascana (DC.) O. Bolòs & Vigo	PERENNIAL	2	1	1	1	1	1	1	1	1	1	1	1	1	1	0	1
51	Dis_ten	Distichoselinum tenuifolium (Lag.) García Martín & Silvestre	PERENNIAL	2	0	0	0	0	0	0	0	0	0	0	0	0	0	1	1
52	Dit_vis	Dittrichia viscosa (L.) Greuter	PERENNIAL	1	1	1	1	1	1	1	1	1	1	1	1	1	1	1	1
53	Ech_gra	Echium creticum subsp. granatense (Coincy) Valdés	ANNUAL	1	0	0	0	0	0	0	0	0	1	1	1	1	0	1	1
54	Eph_fra	Ephedra fragilis subsp. fragilis Desf.	PERENNIAL	1	0	0	0	0	0	0	1	1	1	1	1	1	1	0	0
55	Ero_chi	Erodium chium (L.) Willd.	ANNUAL	1	0	0	0	0	1	0	0	0	0	1	1	1	1	1	0
56	Ery_cam	Eryngium campestre L.	PERENNIAL	1	0	0	0	0	0	0	0	0	0	0	0	0	0	0	1
57	Eup_exi	Euphorbia exigua subsp. exigua L.	ANNUAL	1	0	0	0	0	0	0	0	0	0	0	0	0	0	0	1
58	Eup_fal	Euphorbia falcata subsp. falcata L.	ANNUAL	1	0	0	0	0	0	0	0	0	0	0	0	0	0	0	1
59	Eup_ser	Euphorbia serrata L.	PERENNIAL	1	0	0	0	0	0	0	0	0	0	0	0	0	0	0	1
60	Fag_cre	Fagonia cretica L.	ANNUAL	1	0	0	0	0	0	0	0	0	0	0	0	0	0	0	1
61	Fer_cat	Ferula communis subsp. catalaunica (Pau ex C. Vicioso) Sánchez Cuxart & M. Bernal	PERENNIAL	2	0	0	0	1	1	1	1	1	1	1	1	1	1	1	1
62	Fil_cas	Filago castroviejoi Andrés-Sánchez, D. Gut. Larr., E. Rico & M. M. Mart. Ort.	ANNUAL	1	0	0	0	0	0	0	0	0	1	1	1	1	1	1	0
63	Fil_des	Filago desertorum Pomel	ANNUAL	1	1	1	1	1	1	0	1	1	0	0	0	0	1	1	0
64	Fil_fus	Filago fuscescens Pomel	ANNUAL	1	0	0	0	0	0	0	0	0	0	0	0	0	0	0	0
65	Fil_lut	Filago lutescens Jord.	ANNUAL	1	0	1	0	0	1	0	1	0	0	0	0	0	0	1	0
66	Fil_pyr	Filago pyramidata L.	ANNUAL	1	1	0	1	0	0	0	0	0	0	1	1	0	0	0	0
67	Fum_eri	Fumana ericoides (Cav.) Gand.	PERENNIAL	2	0	0	0	0	0	0	0	0	0	0	0	0	0	0	1
68	Fum_thy	Fumana thymifolia (L.) Spach ex Webb	PERENNIAL	1.5	0	0	0	0	0	0	0	0	0	0	0	0	0	1	0
69	Gal_mur	Galium murale (L.) All.	ANNUAL	1	0	0	0	0	0	0	0	0	0	0	0	0	0	1	1
70	Gal_ver	Galium verrucosum subsp. verrucosum Huds.	ANNUAL	1	0	0	0	0	0	0	0	0	0	0	0	0	0	0	1
71	Gen_ram	Genista ramosissima (Desf.) Poir.	PERENNIAL	2	0	0	0	0	0	0	0	0	0	0	0	0	0	0	1
72	Gen_spa	Genista spartioides Spach	PERENNIAL	2	0	0	0	0	0	0	0	0	0	0	0	0	0	1	0
73	Gla_com	Gladiolus communis L.	PERENNIAL	1	0	0	0	0	0	0	0	0	0	0	0	0	0	1	0
74	Gyn_sis	Gynandriris sisyrinchium (L.) Parl.	PERENNIAL	1	0	0	0	0	0	0	0	0	0	0	0	0	0	0	1
75	Gyp_str	Gypsophila struthium subsp. struthium L.	PERENNIAL	5	1	1	1	1	1	1	1	1	1	1	1	1	1	0	1
76	Hed_cre	Hedypnois cretica (L.) Dum. Cours.	ANNUAL	1	1	0	0	1	1	0	0	0	0	0	0	0	0	1	1
77	Hel_alm	Helianthemum almeriense Pau	PERENNIAL	1	0	0	0	0	0	0	0	0	0	0	0	0	0	1	1
78	Hel_aly	Helianthemum alypoides Losa & Rivas Goday	PERENNIAL	5	0	0	0	0	0	1	1	1	1	1	1	1	1	1	0
79	Hel_led	Helianthemum ledifolium (L.) Mill.	ANNUAL	1	0	0	0	0	0	0	0	0	0	0	0	0	0	1	1
80	Hel_sal	Helianthemum salicifolium (L.) Mill.	ANNUAL	1	0	0	0	0	0	0	0	0	0	0	0	0	0	0	1
81	Hel_squ	Helianthemum squamatum (L.) Dum. Cours.	PERENNIAL	5	1	1	1	1	1	1	1	1	1	1	1	1	1	0	1
82	Hel_sto	Helichrysum stoechas (L.) Moench	PERENNIAL	1	1	1	1	1	1	1	1	1	1	1	1	1	1	1	1
83	Hel_syr	Helianthemum syriacum (Jacq.) Dum Cours.	PERENNIAL	3	1	1	1	1	1	1	1	1	1	1	1	1	1	1	1
84	Her_alm	Herniaria fontanesii subsp. almeriana Brummitt & Heywood	PERENNIAL	1	0	0	0	0	0	0	0	0	0	0	0	0	0	1	1
85	Hip_cil	Hippocrepis ciliata Willd.	ANNUAL	1	1	0	0	0	0	0	1	1	1	1	1	1	1	0	1
86	Hor_lep	Hordeum murinum subsp. leporinum (Link) Arcang.	ANNUAL	1	0	1	1	0	0	0	0	0	0	0	0	0	0	1	1
87	Hyp_rad	Hypochaeris radicata L.	ANNUAL	1	0	0	0	0	0	0	0	0	0	1	0	0	0	0	0
88	Lac_vim	Lactuca viminea (L.) J. Presl & C. Presl	PERENNIAL	1	0	1	1	1	0	0	1	1	1	1	1	1	0	0	1
89	Lag_ova	Lagurus ovatus L.	ANNUAL	1	0	0	0	0	0	0	1	0	1	0	0	0	0	0	0
90	Lam_aur	Lamarckia aurea (L.) Moench	ANNUAL	1	1	0	0	1	0	0	1	0	0	0	0	1	1	0	1
91	Lat_cly	Lathyrus clymenum L.	ANNUAL	1	0	0	1	1	1	0	1	0	1	1	1	0	0	1	0
92	Lau_arb	Launaea arborescens (Batt.) Murb.	PERENNIAL	1	0	0	0	0	0	0	0	0	0	0	0	0	0	0	0
93	Lau_fra	Launaea fragilis (Asso) Pau	PERENNIAL	3	0	0	1	1	1	1	1	1	1	1	1	1	1	1	0
94	Lau_lan	Launaea lanifera Pau	PERENNIAL	2	1	1	1	1	1	1	1	1	1	1	1	1	1	1	1
95	Lau_pum	Launaea pumila (Cav.) Kuntze	PERENNIAL	3	0	0	0	0	0	0	0	0	1	0	0	0	0	0	1
96	Lin_ara	Linaria oblongifolia subsp. aragonensis (Lange) Valdés	ANNUAL	2	0	0	0	0	0	0	0	0	0	0	0	0	0	1	1
97	Lin_str	Linum strictum subsp. strictum L.	ANNUAL	1	1	1	1	1	1	0	1	1	1	1	1	0	0	0	1
98	Lob_mar	Lobularia maritima subsp. maritima (L.) Desv.	PERENNIAL	1	0	0	0	0	0	0	0	0	0	0	0	0	0	1	1
99	Loe_his	Loeflingia hispanica L.	ANNUAL	1	1	0	0	0	0	0	0	0	0	0	0	0	0	0	1
100	Lol_rig	Lolium rigidum Gaudin	ANNUAL	1	0	0	0	0	0	0	0	1	1	0	0	1	0	0	0
101	Lom_str	Lomelosia stellata (L.) Raf.	ANNUAL	1	0	0	0	0	0	0	0	0	0	0	0	0	0	1	1
102	Lyc_int	Lycium intricatum Boiss.	PERENNIAL	1	0	0	0	0	0	0	0	0	0	0	0	0	1	0	0
103	Lyg_spa	Lygeum spartum L.	ANNUAL	2	0	0	0	0	0	0	0	0	0	0	0	0	0	0	0
104	Med_lit	Medicago littoralis Rohde ex Loisel.	ANNUAL	1	0	0	0	0	0	0	0	1	0	0	1	0	1	1	0
105	Med_min	Medicago minima (L.) L.	ANNUAL	1	0	0	0	0	0	0	1	1	0	0	0	1	0	1	1
106	Med_pol	Medicago polymorpha L.	ANNUAL	1	0	0	0	0	1	0	0	0	1	1	1	1	1	1	0
107	Mel_mag	Melica ciliata subsp. magnolii (Gren. & Godr.) K. Richt.	ANNUAL	1	0	0	1	0	0	0	1	1	0	0	0	0	0	1	0
108	Mor_arv	Moricandia arvensis (L.) DC.	ANNUAL	1	0	0	0	0	0	0	0	0	0	0	0	0	0	0	0
109	Nar_sal	Narduroides salzmannii (Boiss.) Rouy	ANNUAL	1	0	0	0	0	0	0	0	0	1	0	0	0	0	1	0
110	Nar_tor	Narcissus tortifolius Fern. Casas	PERENNIAL	4	0	0	0	0	0	0	0	0	0	0	0	0	0	0	0
111	Ono_mol	Ononis reclinata subsp. mollis (Savi) Bég.	ANNUAL	1	1	1	1	1	1	0	1	1	1	1	1	0	0	1	1
112	Ono_orn	Ononis ornithopodioides L.	ANNUAL	1	0	0	0	0	0	0	0	0	0	0	0	1	1	1	1
113	Ono_ram	Ononis ramosissima Desf.	PERENNIAL	1	0	0	0	0	0	0	0	1	0	0	0	0	0	0	0
114	Ono_sic	Ononis sicula Guss.	ANNUAL	1	0	0	0	0	0	0	0	0	0	0	1	0	0	0	0
115	Ono_tri	Ononis tridentata subsp. tridentata L.	PERENNIAL	4.5	1	1	1	1	1	1	1	1	1	0	0	0	1	0	0
116	Ono_vis	Ononis viscosa L.	ANNUAL	1	1	0	0	0	0	0	0	0	0	0	0	0	0	1	1
117	Oro_ram	Ononis ramosissima Desf.	ANNUAL	1	0	0	0	0	0	0	0	0	0	0	0	0	0	0	0
118	Pal_spi	Pallenis spinosa (L.) Cass.	ANNUAL	1	0	1	0	0	0	0	1	0	1	1	1	1	1	0	1
119	Par_arg	Paronychia argentea Lam.	PERENNIAL	1	0	0	0	0	0	0	1	0	1	0	0	0	0	0	1
120	Par_cap	Paronychia capitata subsp. capitata (L.) Lam.	PERENNIAL	1	0	0	0	1	0	0	0	0	0	1	0	1	1	0	0
121	Par_inc	Parapholis incurva (L.) C.E.Hubb.	ANNUAL	1	1	1	1	1	1	0	1	0	0	0	0	1	1	0	1
122	Pha_rup	Phagnalon rupestre subsp. rupestre (L.) DC.	PERENNIAL	1	1	1	0	1	0	0	1	0	0	0	0	0	1	0	0
123	Pha_sax	Phagnalon saxatile (L.) Cass.	PERENNIAL	1	1	1	1	1	1	1	1	1	1	1	1	1	1	0	1
124	Phl_pur	Phlomis purpurea L.	PERENNIAL	1	0	0	0	0	0	0	0	0	0	0	0	0	0	1	1
125	Phr_aus	Phragmites australis (Cav.) Trin. ex Steud.	PERENNIAL	1	0	0	0	0	0	0	0	0	0	0	0	0	0	1	0
126	Pic_int	Picris hispanica (Willd.) P. D. Sell	PERENNIAL	1	1	1	0	1	0	0	0	0	0	0	0	0	0	1	0
127	Pip_mil	Piptatherum miliaceum (L.) Coss.	PERENNIAL	1	1	1	1	1	1	1	1	1	1	1	1	1	1	0	0
128	Pla_afr	Plantago afra L.	ANNUAL	1	0	0	0	0	0	0	0	0	0	0	0	0	0	1	0
129	Pla_alb	Plantago albicans L.	PERENNIAL	1	0	0	0	0	0	0	0	0	0	0	0	0	0	0	1
130	Pla_lag	Plantago lagopus L.	ANNUAL	1	0	0	0	0	1	0	1	0	0	0	0	1	1	1	1
131	Pla_ova	Plantago ovata Forssk.	ANNUAL	1	0	0	0	0	0	0	1	1	1	0	1	0	0	0	1
132	Poa_bul	Poa bulbosa L.	PERENNIAL	1	0	0	0	0	0	0	0	0	0	0	0	0	0	0	1
133	Pol_mon	Polygala monspeliaca L.	ANNUAL	1	0	0	0	0	0	0	0	0	0	0	0	0	1	0	1
134	Pol_rup	Polygala rupestris Pourr.	PERENNIAL	1	0	0	0	0	0	0	0	0	0	0	0	0	0	1	0
135	Rei_int	Reichardia intermedia (Sch. Bip.) Samp.	ANNUAL	1	0	1	0	1	1	0	1	1	1	1	1	1	1	0	1
136	Rei_tin	Reichardia tingitana (L.) Roth	ANNUAL	1	1	1	1	1	1	0	1	1	1	1	1	1	1	0	0
137	Res_fun	Reseda stricta subsp. funkii (Willk.) Losa & Rivas Goday	ANNUAL	4	0	1	0	0	1	0	0	0	0	0	0	0	0	1	1
138	Res_lutea	Reseda lutea L.	ANNUAL	1	0	0	0	0	0	0	0	0	0	0	0	0	0	1	1
139	Res_phy	Reseda phyteuma L.	ANNUAL	1	0	0	0	0	0	0	0	0	0	0	0	0	0	1	0
140	Ret_mon	Retama monosperma (L.) Boiss.	PERENNIAL	1	0	0	0	0	0	0	0	0	0	0	0	0	0	0	1
141	Ret_sph	Retama sphaerocarpa (L.) Boiss.	PERENNIAL	1	0	0	0	0	0	1	1	1	1	1	1	1	1	1	0
142	Ros_eri	Rosmarinus eriocalix Jord. & Fourr.	PERENNIAL	2	0	0	0	0	0	0	0	0	0	0	0	0	0	1	1
143	Ros_off	Rosmarinus officinalis L.	PERENNIAL	1	0	0	0	0	0	0	0	0	0	0	0	0	0	1	0
144	Ros_pum	Rostraria pumila (Desf.) Tzvelev	ANNUAL	1	1	1	1	1	1	0	1	0	0	0	1	1	0	1	1
145	Rub_per	Rubia peregrina L.	PERENNIAL	1	0	0	0	0	0	0	0	0	0	0	0	1	1	0	1
146	Rum_ace	Rumex acetosa subsp. acetosa L.	PERENNIAL	1	0	0	0	0	0	0	0	0	0	0	0	1	1	0	0
147	Rum_buc	Rumex bucephalophorus L.	ANNUAL	1	0	0	0	0	0	0	0	0	0	1	0	0	0	0	0
148	Sal_opp	Salsola oppositifolia Desf.	PERENNIAL	1	0	0	0	0	0	0	0	0	0	0	0	0	0	0	0
149	San_vis	Santolina viscosa Lag.	PERENNIAL	4	1	1	1	1	1	1	1	1	1	1	1	1	1	1	0
150	Sch_bar	Schismus barbatus (L.) Thell.	ANNUAL	1	0	1	1	0	0	0	0	0	0	0	0	1	0	0	1
151	Sco_mur	Scorpiurus muricatus L.	ANNUAL	1	0	0	0	0	0	0	0	0	0	0	1	0	0	0	0
152	Sed_gyp	Sedum gypsicola Boiss. & Reut.	PERENNIAL	4	1	1	1	1	1	1	1	1	1	1	1	1	1	0	1
153	Sed_sed	Sedum sediforme (Jacq.) Pau	PERENNIAL	1	1	1	1	1	1	1	1	1	1	1	1	1	1	1	1
154	Sen_lin	Senecio linifolius (L.) L.	ANNUAL	1	0	0	0	0	0	0	0	1	0	0	0	0	0	1	1
155	Sen_mal	Senecio malacitanus Huter	PERENNIAL	1	0	1	0	1	0	0	0	0	0	0	0	0	0	0	0
156	Sil_col	Silene colorata Poir.	ANNUAL	1	0	0	0	0	0	0	0	0	0	0	0	0	0	0	0
157	Sil_scl	Silene sclerocarpa Dufour	ANNUAL	1	0	0	0	0	1	0	0	0	0	0	0	0	0	1	1
158	Sil_sec	Silene secundiflora Otth	ANNUAL	1	1	1	0	0	0	0	1	0	0	0	0	0	0	0	1
159	Sol_nig	Solanum nigrum L.	ANNUAL	1	0	0	0	0	0	0	0	0	1	0	1	1	0	0	0
160	Son_ole	Sonchus oleraceus L.	ANNUAL	1	0	0	1	0	1	0	0	0	1	0	0	0	0	1	0
161	Son_ten	Sonchus tenerrimus L.	ANNUAL	1	1	1	1	1	1	1	1	1	1	1	1	1	1	0	1
162	Sti_cap	Stipa capensis Thunb.	ANNUAL	1	1	1	1	1	1	1	1	1	1	1	1	1	1	1	0
163	Sti_par	Stipa parviflora Desf.	PERENNIAL	2	1	1	1	1	1	1	1	1	1	1	1	1	1	1	1
164	Sti_ten	Stipa tenacissima Loefl. ex L.	PERENNIAL	2	0	0	0	0	0	0	0	0	0	0	0	1	1	0	1
165	Tam_can	Tamarix canariensis Willd.	PERENNIAL	1	0	0	0	0	0	0	0	0	0	0	0	0	0	1	1
166	Teu_pse	Teucrium pseudochamaepitys L.	PERENNIAL	1	0	0	0	0	0	0	0	0	0	0	0	0	0	1	0
167	Teu_tur	Teucrium turredanum Losa & Rivas Goday	PERENNIAL	5	1	1	1	1	1	1	1	1	1	1	1	1	1	1	1
168	The_hum	Thesium humile Vahl	ANNUAL	1	0	0	0	0	0	0	0	0	0	0	0	0	0	1	1
169	Thr_his	Thrincia hispida Roth	ANNUAL	1	1	1	1	1	1	0	1	1	1	1	1	1	1	0	0
170	Thy_hir	Thymelaea hirsuta (L.) Endl.	PERENNIAL	1.5	0	0	1	1	1	1	1	1	1	1	1	1	1	0	1
171	Thy_hye	Thymus hyemalis subsp. hyemalis Lange	PERENNIAL	1	1	0	1	0	0	1	1	1	1	1	1	1	1	1	1
172	Tol_bar	Tolpis barbata (L.) Gaertn.	ANNUAL	1	0	0	0	0	0	0	0	0	0	0	0	1	0	1	1
173	Tra_ang	Tragopogon angustifolius Willd.	ANNUAL	1	0	1	0	0	0	0	0	0	0	0	0	0	1	0	0
174	Tra_por	Tragopogon porrifolius L.	ANNUAL	1	0	0	0	0	0	0	0	0	0	0	1	0	0	0	0
175	Tri_loe	Trisetum loeflingianum (L.) C. Presl	ANNUAL	1	0	0	0	0	1	0	0	0	0	0	0	0	0	1	0
176	Tri_pol	Trigonella polyceratia L.	ANNUAL	1	0	0	0	0	0	0	0	0	0	0	0	0	0	0	0
177	Urg_mar	Urginea maritima (L.) Baker	PERENNIAL	1	0	0	0	0	0	0	0	0	0	0	0	0	0	1	0
178	Uro_pic	Urospermum picroides (L.) F. W. Schmidt	ANNUAL	1	1	0	1	1	1	0	1	0	0	1	1	1	1	1	1
179	Val_his	Valantia hispida L.	ANNUAL	1	0	0	0	0	0	0	1	0	1	0	0	0	0	0	1
180	Vic_pse	Vicia pseudocracca Bertol.	ANNUAL	1	0	0	0	0	0	0	0	0	0	0	0	1	1	0	1
181	Vul_cil	Vulpia ciliata subsp. ciliata Dumort.	ANNUAL	1	0	1	1	1	1	1	1	1	1	1	1	1	1	0	0
182	Vul_sci	Vulpia myuros subsp. sciuroides (Roth) Rouy	ANNUAL	1	1	0	0	1	0	0	0	0	1	0	0	0	0	1	0
183	Xi_vul	Xiphion vulgare Mill.	PERENNIAL	1	0	0	0	0	0	0	0	0	0	0	0	0	0	0	1
